# Supplementary material for: Silencing of the Rice Gene LRR1 Compromises Rice Xa21 Transcript Accumulation and XA21-Mediated Immunity
Source: PubMed Central journal article supplement (PMC5440417; doi:10.1186/s12284-017-0162-5), 2017-05-22

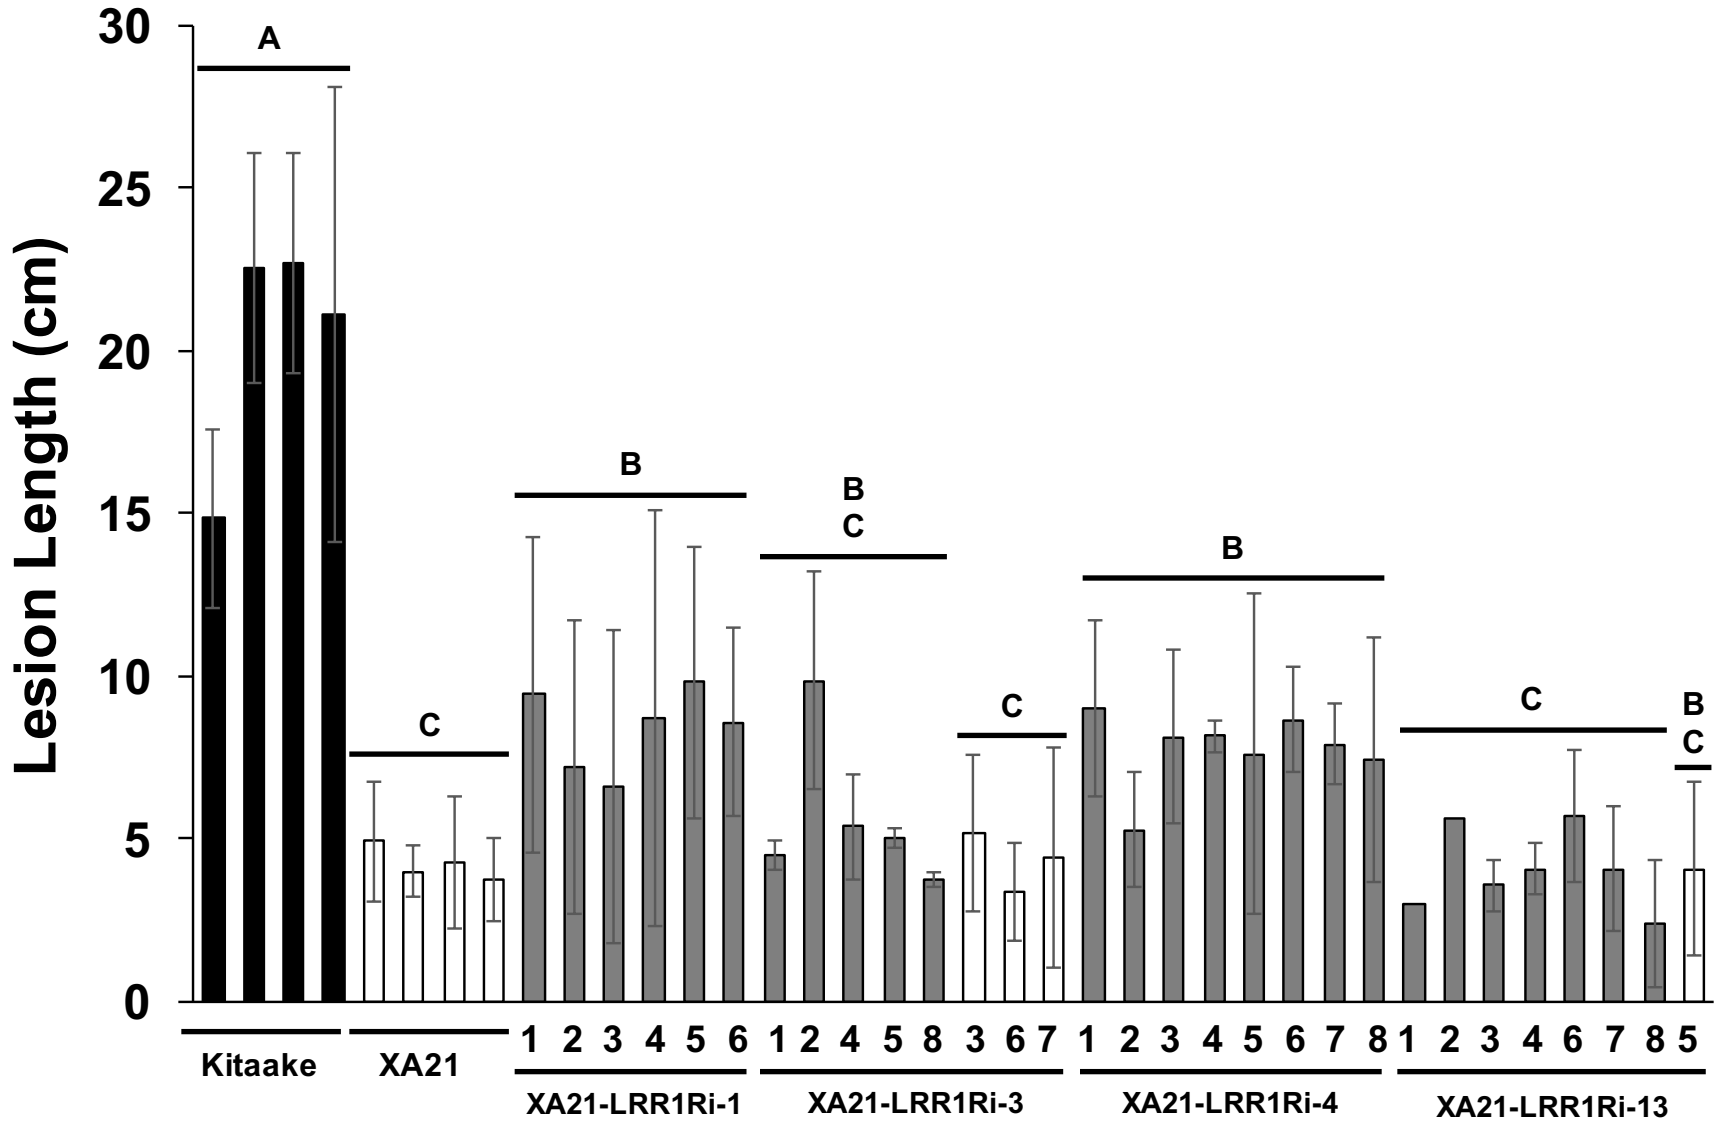

Supplement: 12284_2017_162_MOESM3_ESM.pdf [file 12284_2017_162_MOESM3_ESM.pdf]
