# Supplementary material for: Silencing of the Rice Gene LRR1 Compromises Rice Xa21 Transcript Accumulation and XA21-Mediated Immunity
Source: Rice (N Y). 2017 May 22;10:23. doi: 10.1186/s12284-017-0162-5 (PMC5440417; doi:10.1186/s12284-017-0162-5)
Supplement: Supplementary file 6 — Pairwise alignment of LRR1Ri and XA21. The region of LRR1 used to develop the LRR1Ri vector was aligned to XA21 using Geneious R6.1.8 (Kearse et al. 2012). Nucleotide numbers refer to the original sequences. Highlighted in black are the conserved nucleotides between the two sequences. The shared identity within the consensus region is 56.8%. (PDF 40 kb) [file 12284_2017_162_MOESM6_ESM.pdf]

|        |     |   |   |   |   |   |   |   |   |   |   |   |   |   |   |   |   |   |   |   |   |   |   |   |   |   |   |   |   |   |   |   |   |   |   |   |   |   |   |   |   |   |
|--------|-----|---|---|---|---|---|---|---|---|---|---|---|---|---|---|---|---|---|---|---|---|---|---|---|---|---|---|---|---|---|---|---|---|---|---|---|---|---|---|---|---|---|
| XA21   | 487 | C | T | G | C | G | A | G | G | T | A | T | G | A | T | C | C | C | A | - | C | G | T | G | A | G | A | T | - | T | G | G | T | G | C | C | - | - | A | G | C |   |
| LRR1Ri | 1   | T | T | G | G | G | A | - | A | T | T | T | G | A | A | C | T | T | A | T | C | T | G | G | T | C | A | T | C | T | G | G | T | G | C | C | T | G | A | G | C |   |
| XA21   | 523 | T | T | G | - | A | A | A | - | - | - | - | - | - | - | C | A | T | C | T | C | T | C | G | A | A | T | T | T | G | T | A | C | C | T | T | T | A | C | A | A |   |
| LRR1Ri | 40  | T | T | G | G | A | A | A | G | T | T | G | G | A | T | C | A | T | C | T | G | C | A | A | T | A | T | C | T | G | G | A | G | C | T | A | T | A | C | A | A |   |
| XA21   | 555 | A | A | A | T | G | G | T | T | T | G | T | C | A | G | G | A | G | A | G | A | T | T | C | C | A | T | C | C | G | C | T | T | T | G | G | G | C | A | A | T |   |
| LRR1Ri | 80  | G | A | A | T | A | A | T | A | T | T | C | A | A | G | G | A | A | C | G | A | T | C | C | C | A | T | C | G | G | A | A | C | T | T | G | G | T | A | A | T |   |
| XA21   | 595 | C | T | C | A | C | T | A | G | C | C | T | C | C | A | G | G | A | G | - | T | T | T | G | A | T | T | T | G | A | G | C | T | T | C | A | A | C | A | G | A |   |
| LRR1Ri | 120 | T | T | G | A | A | G | A | A | T | C | T | T | - | A | T | A | A | G | C | T | T | G | G | A | C | C | T | G | T | A | C | A | A | G | A | A | C | A | A | C |   |
| XA21   | 634 | T | T | A | T | C | A | G | G | A | G | C | T | A | T | A | C | C | T | T | C | A | T | C | A | C | T | G | G | G | G | C | A | G | C | T | C | A | G | C | A |   |
| LRR1Ri | 159 | A | T | T | T | C | T | G | G | G | A | C | T | A | T | A | C | C | T | C | C | A | A | C | A | C | T | T | G | G | G | A | A | A | T | T | A | A | - | - | C |   |
| XA21   | 674 | G | T | C | T | A | T | T | G | A | C | T | A | T | G | A | A | T | T | T | G | G | G | A | C | A | G | A | A | - | - | - | C | A | A | T | C | - | - | - | T |   |
| LRR1Ri | 197 | G | T | C | C | C | T | T | G | - | - | T | A | T | - | - | T | C | T | T | G | C | G | G | C | T | C | A | A | T | G | G | C | A | A | T | C | G | C | T | T |   |
| XA21   | 708 | A | A | G | T | G | G | G | A | T | G | A | T | C | C | C | C | A | A | A | T | - | - | T | C | T | A | T | C | T | G | G | A | A | C | C | T | T | T | C | G | T |
| LRR1Ri | 233 | G | A | C | T | G | G | G | C | C | A | A | T | C | C | C | A | A | A | G | G | G | A | A | C | T | G | G | C | C | G | G | A | A | T | A | T | C | T | A | G | T |
| XA21   | 746 | C | T | C | T | A | A | G | A | G | C | G | T | T | T | A | - | G | T | G | T | C | A | G | A | G | A | A | A | A | C | A | A | G | C | T | A | G | G | T | G |   |
| LRR1Ri | 273 | C | T | - | T | A | A | A | G | T | T | G | T | T | G | A | T | G | T | T | T | C | A | - | A | G | C | - | A | A | T | G | A | T | C | T | G | T | G | T | G |   |
| XA21   | 785 | G | T | A | T | G | A | T | C | C | C | T | A | C | A | - | A | A | T | G | - | - | C | A | T | T | C | A | A | A | A | C | C | C | T | T | C | A | C | C | T |   |
| LRR1Ri | 310 | G | A | A | C | A | A | T | T | C | C | T | A | C | A | T | C | A | G | G | A | C | C | A | T | T | T | G | A | G | C | A | C | A | T | T | C | C | C | C | T |   |
| XA21   | 822 | C | C | T | C | G | A | G | G |   |   |   |   |   |   |   |   |   |   |   |   |   |   |   |   |   |   |   |   |   |   |   |   |   |   |   |   |   |   |   |   |   |
| LRR1Ri | 350 | A | A | G | C | A | A | C | T |   |   |   |   |   |   |   |   |   |   |   |   |   |   |   |   |   |   |   |   |   |   |   |   |   |   |   |   |   |   |   |   |   |
